# Supplementary material for: Synergic effect of CaI2 and LiI on ionic conductivity of solution-based synthesized Li7P3S11 solid electrolyte
Source: Royal Society of Chemistry journal article supplement (doi:10.1039/d4ra00442f), 2024-01-01
Supplement: d4ra00442f1.pdf [file d4ra00442f1.pdf]

*Supporting Information*

# **Synergic Effect of $\text{CaI}_2$ and $\text{LiI}$ on Ionic Conductivity of Solution-based Synthesized $\text{Li}_7\text{P}_3\text{S}_{11}$ Solid Electrolyte**

Tran Anh Tu<sup>1,2,3</sup>, Tran Viet Toan<sup>1,2</sup>, Luu Tuan Anh<sup>1,2</sup>, Le Van Thang<sup>1,2,3</sup>, Nguyen Huu Huy Phuc<sup>1,2,3\*</sup>

<sup>1</sup>Faculty of Materials Technology, Ho Chi Minh City University of Technology (HCMUT), 268 Ly Thuong Kiet Str., Dist. 10, Ho Chi Minh City, Vietnam

<sup>2</sup>Vietnam National University Ho Chi Minh City, Linh Trung Ward, Thu Duc Dist., Ho Chi Minh City, Vietnam

<sup>3</sup>VNU-HCM Key Laboratory for Material Technologies, Ho Chi Minh City University of Technology (HCMUT), 268 Ly Thuong Kiet Str., Dist. 10, Ho Chi Minh City, Vietnam

Corresponding author: [nhhphuc@hcmut.edu.vn](mailto:nhhphuc@hcmut.edu.vn) (NHH. Phuc)

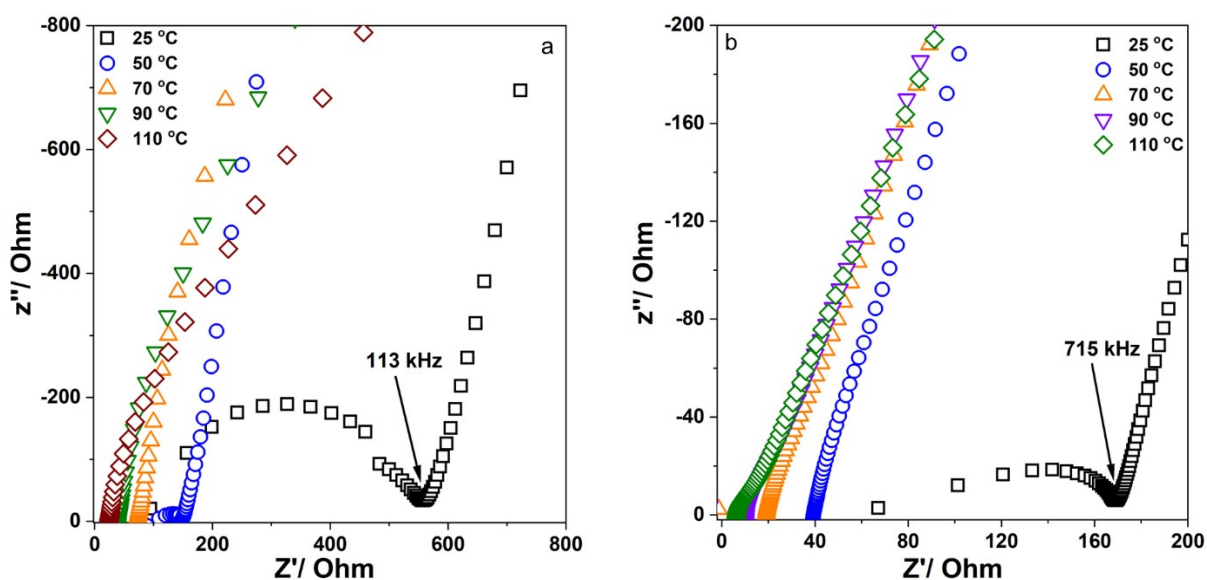

Figure S1: Electrochemical Impedance Spectra of the prepared (a) LPS and (b) 5CaI<sub>2</sub> solid electrolyte.

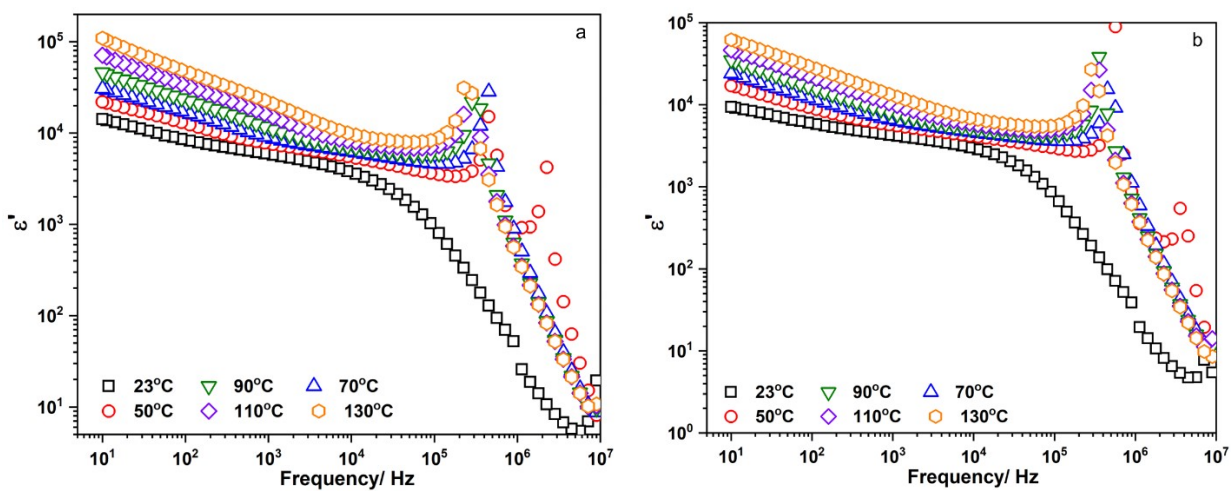

Figure S2: Frequency dependence of the real part of dielectric constant,  $\epsilon'$ , of (a) 5CaCl<sub>2</sub> and (b) 5CaBr<sub>2</sub>

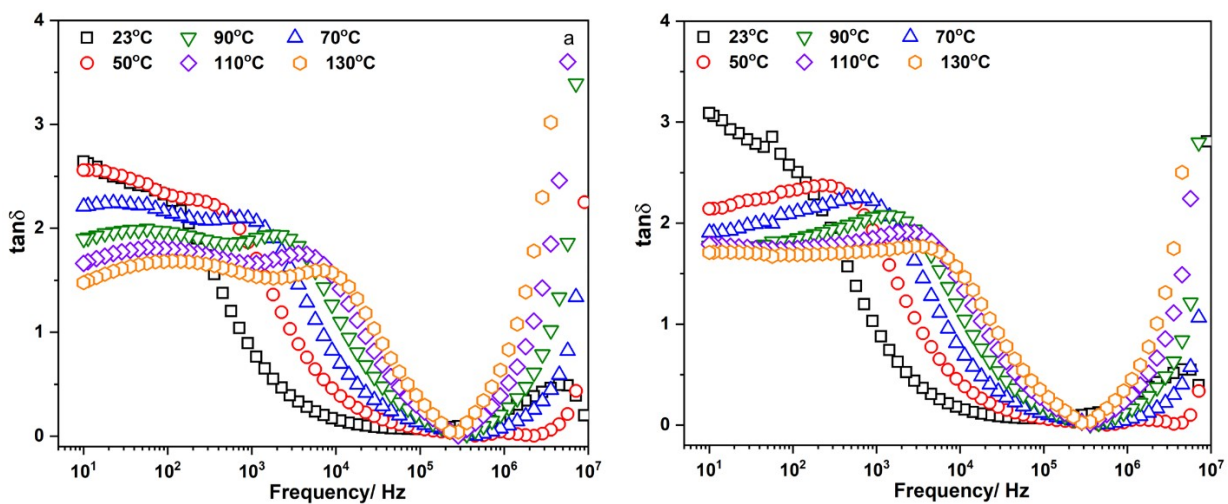

Figure S3: Frequency dependence of the real part of the loss factor,  $\tan\delta$ , of (a) 5CaCl<sub>2</sub> and (b) 5CaBr<sub>2</sub>
